# Supplementary figures and images for: Proteomic Analyses of the Unexplored Sea Anemone Bunodactis verrucosa
Source: MDPI journal article supplement (doi:10.3390/md16020042), 2018-01-24

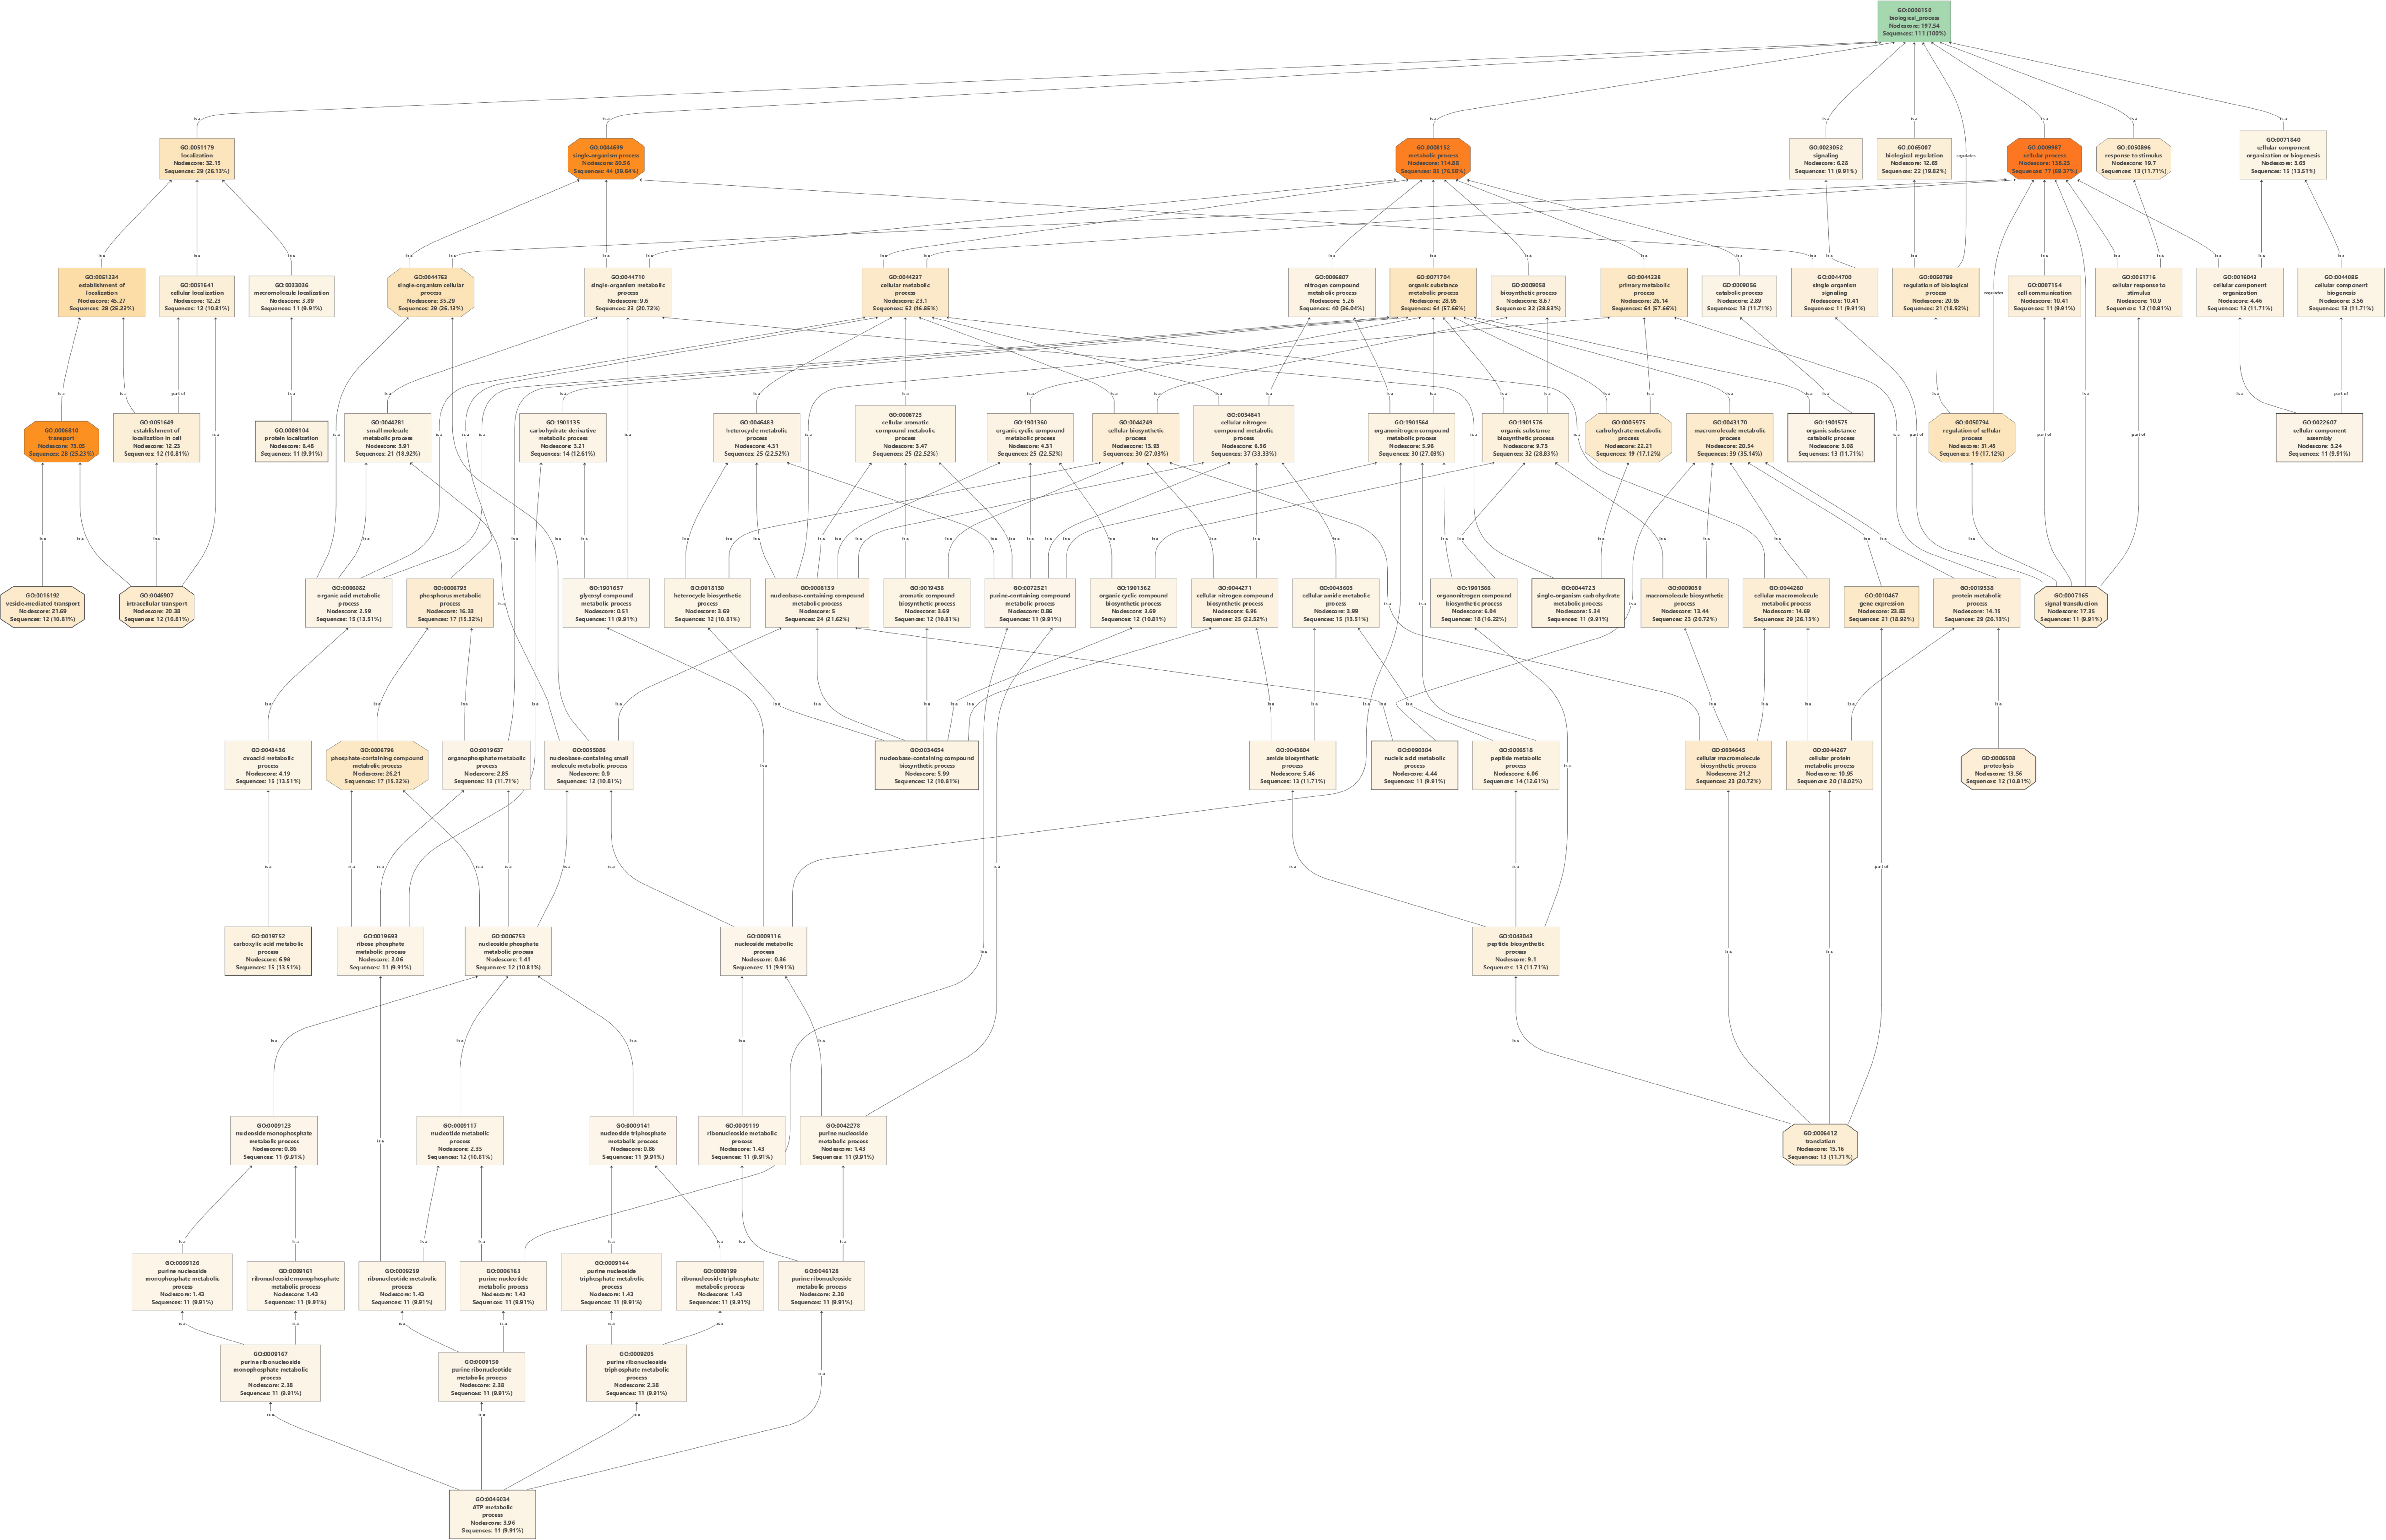

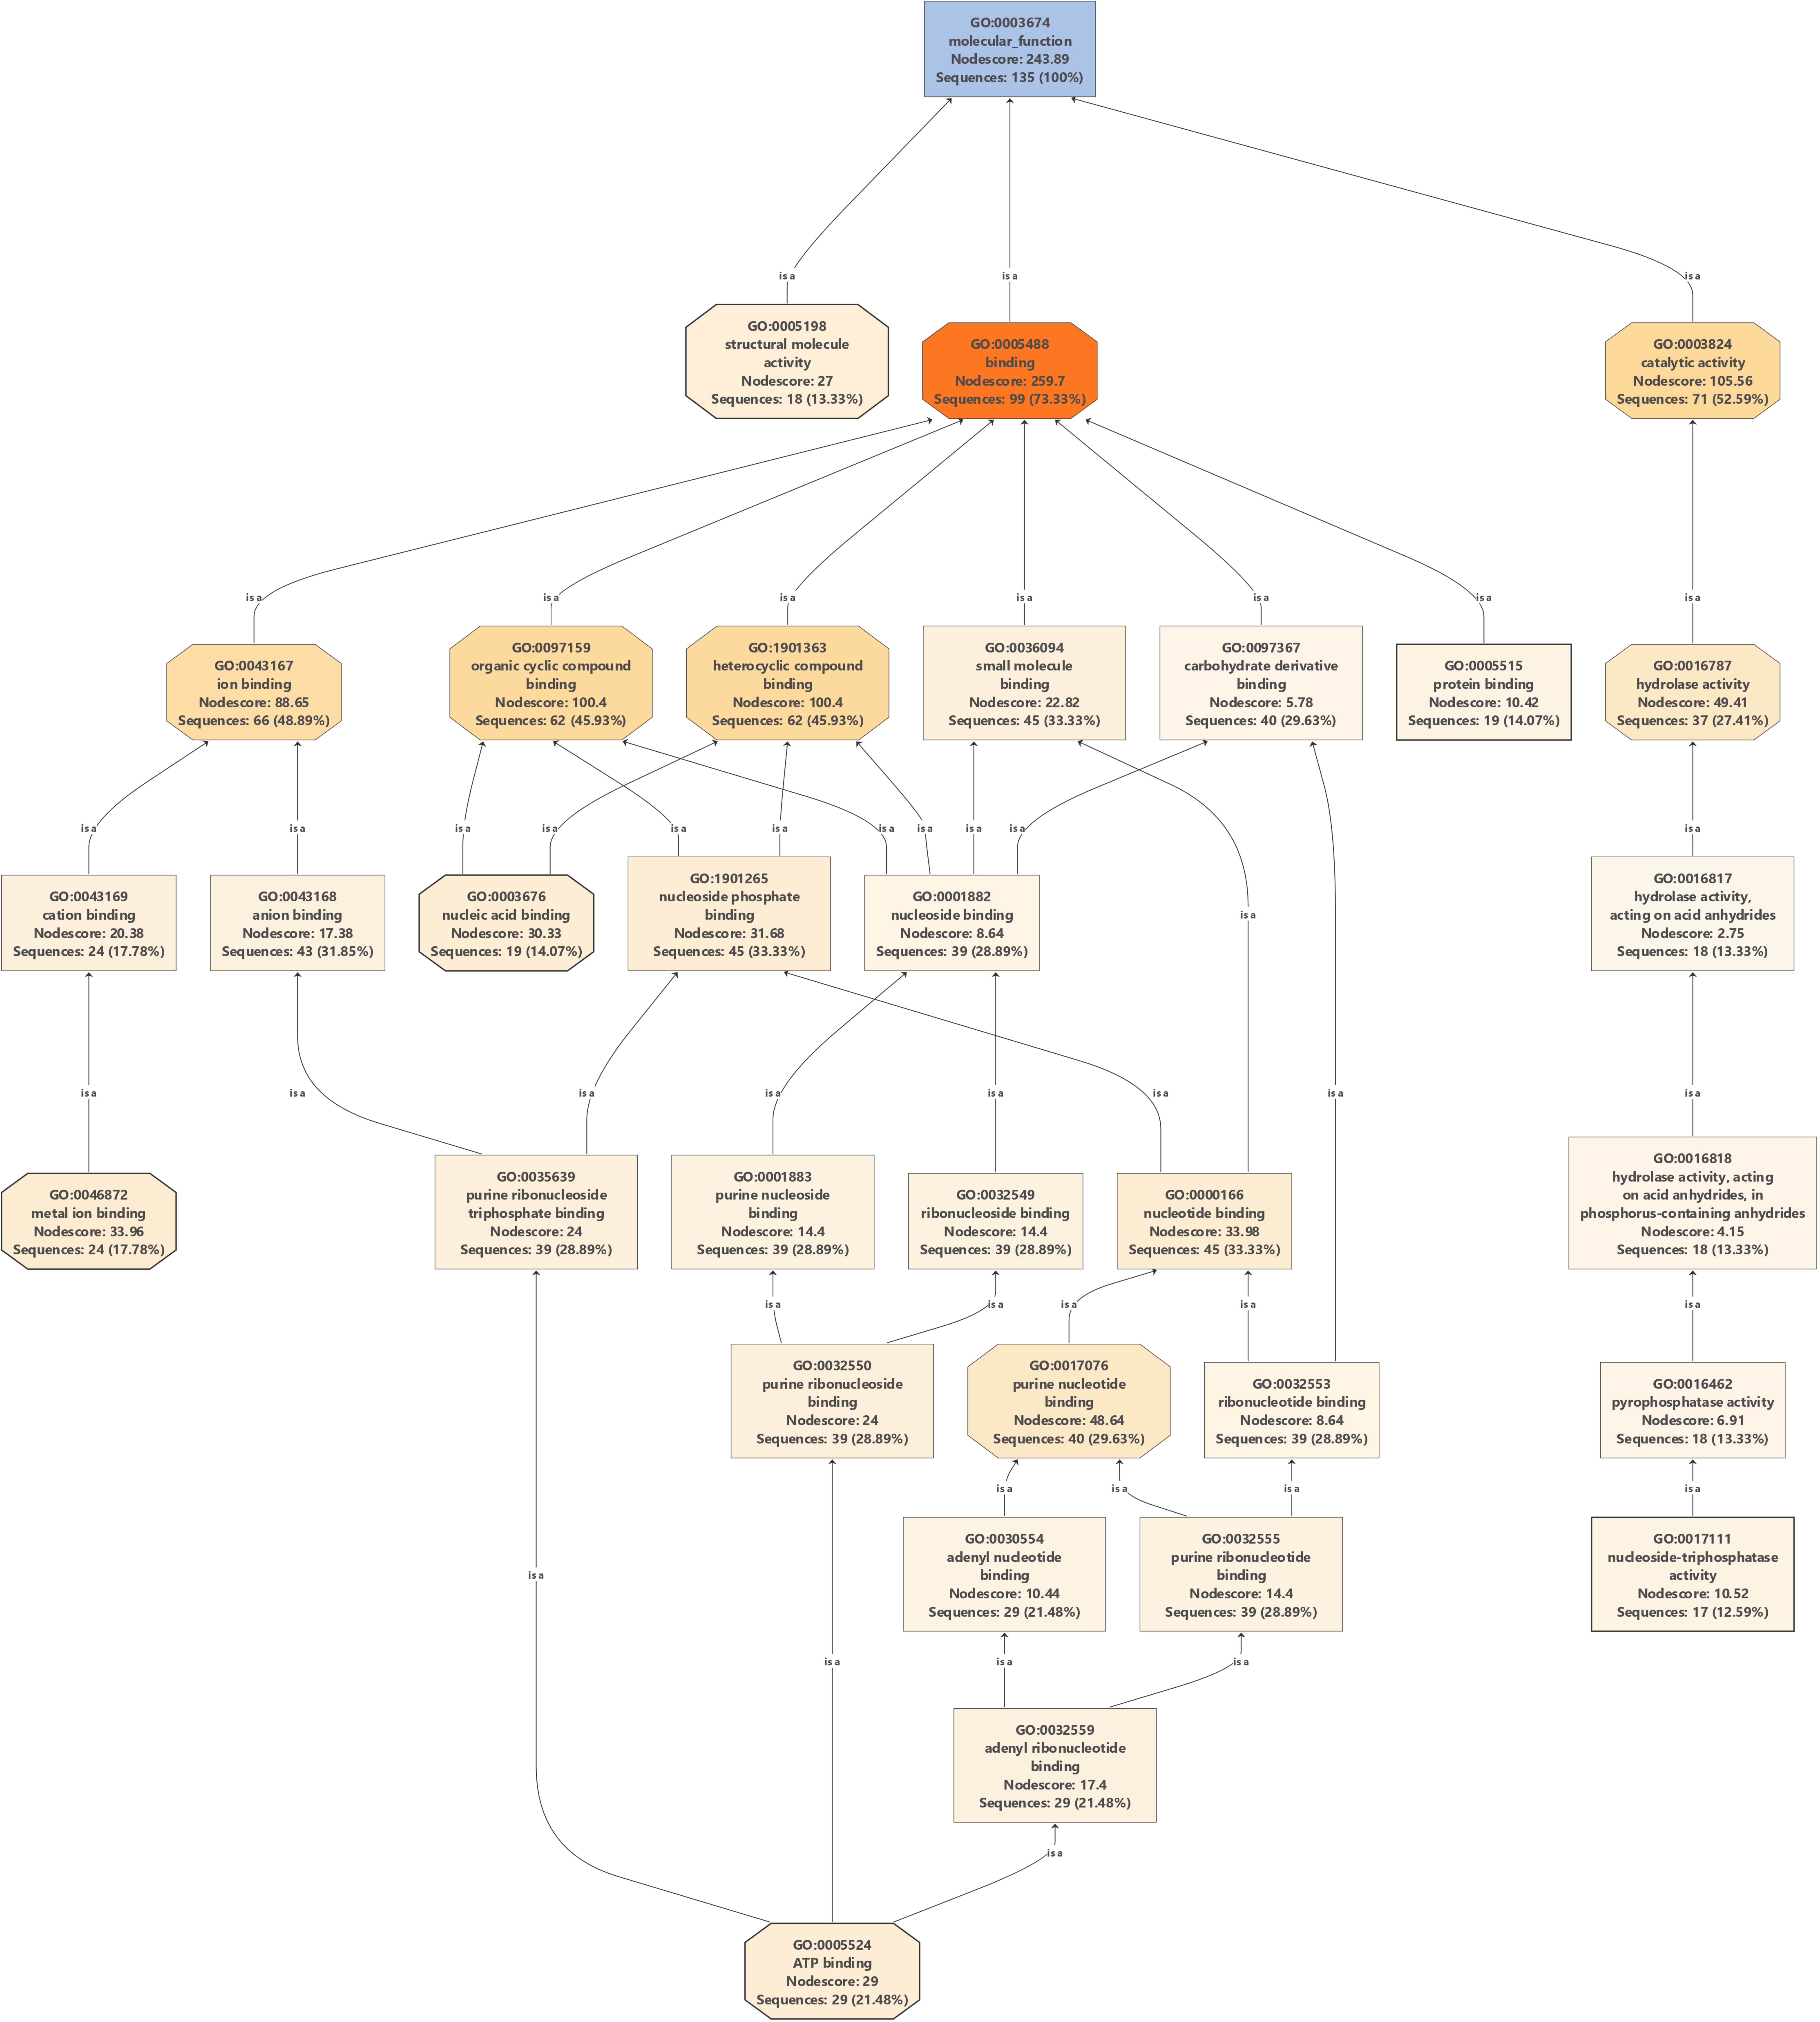

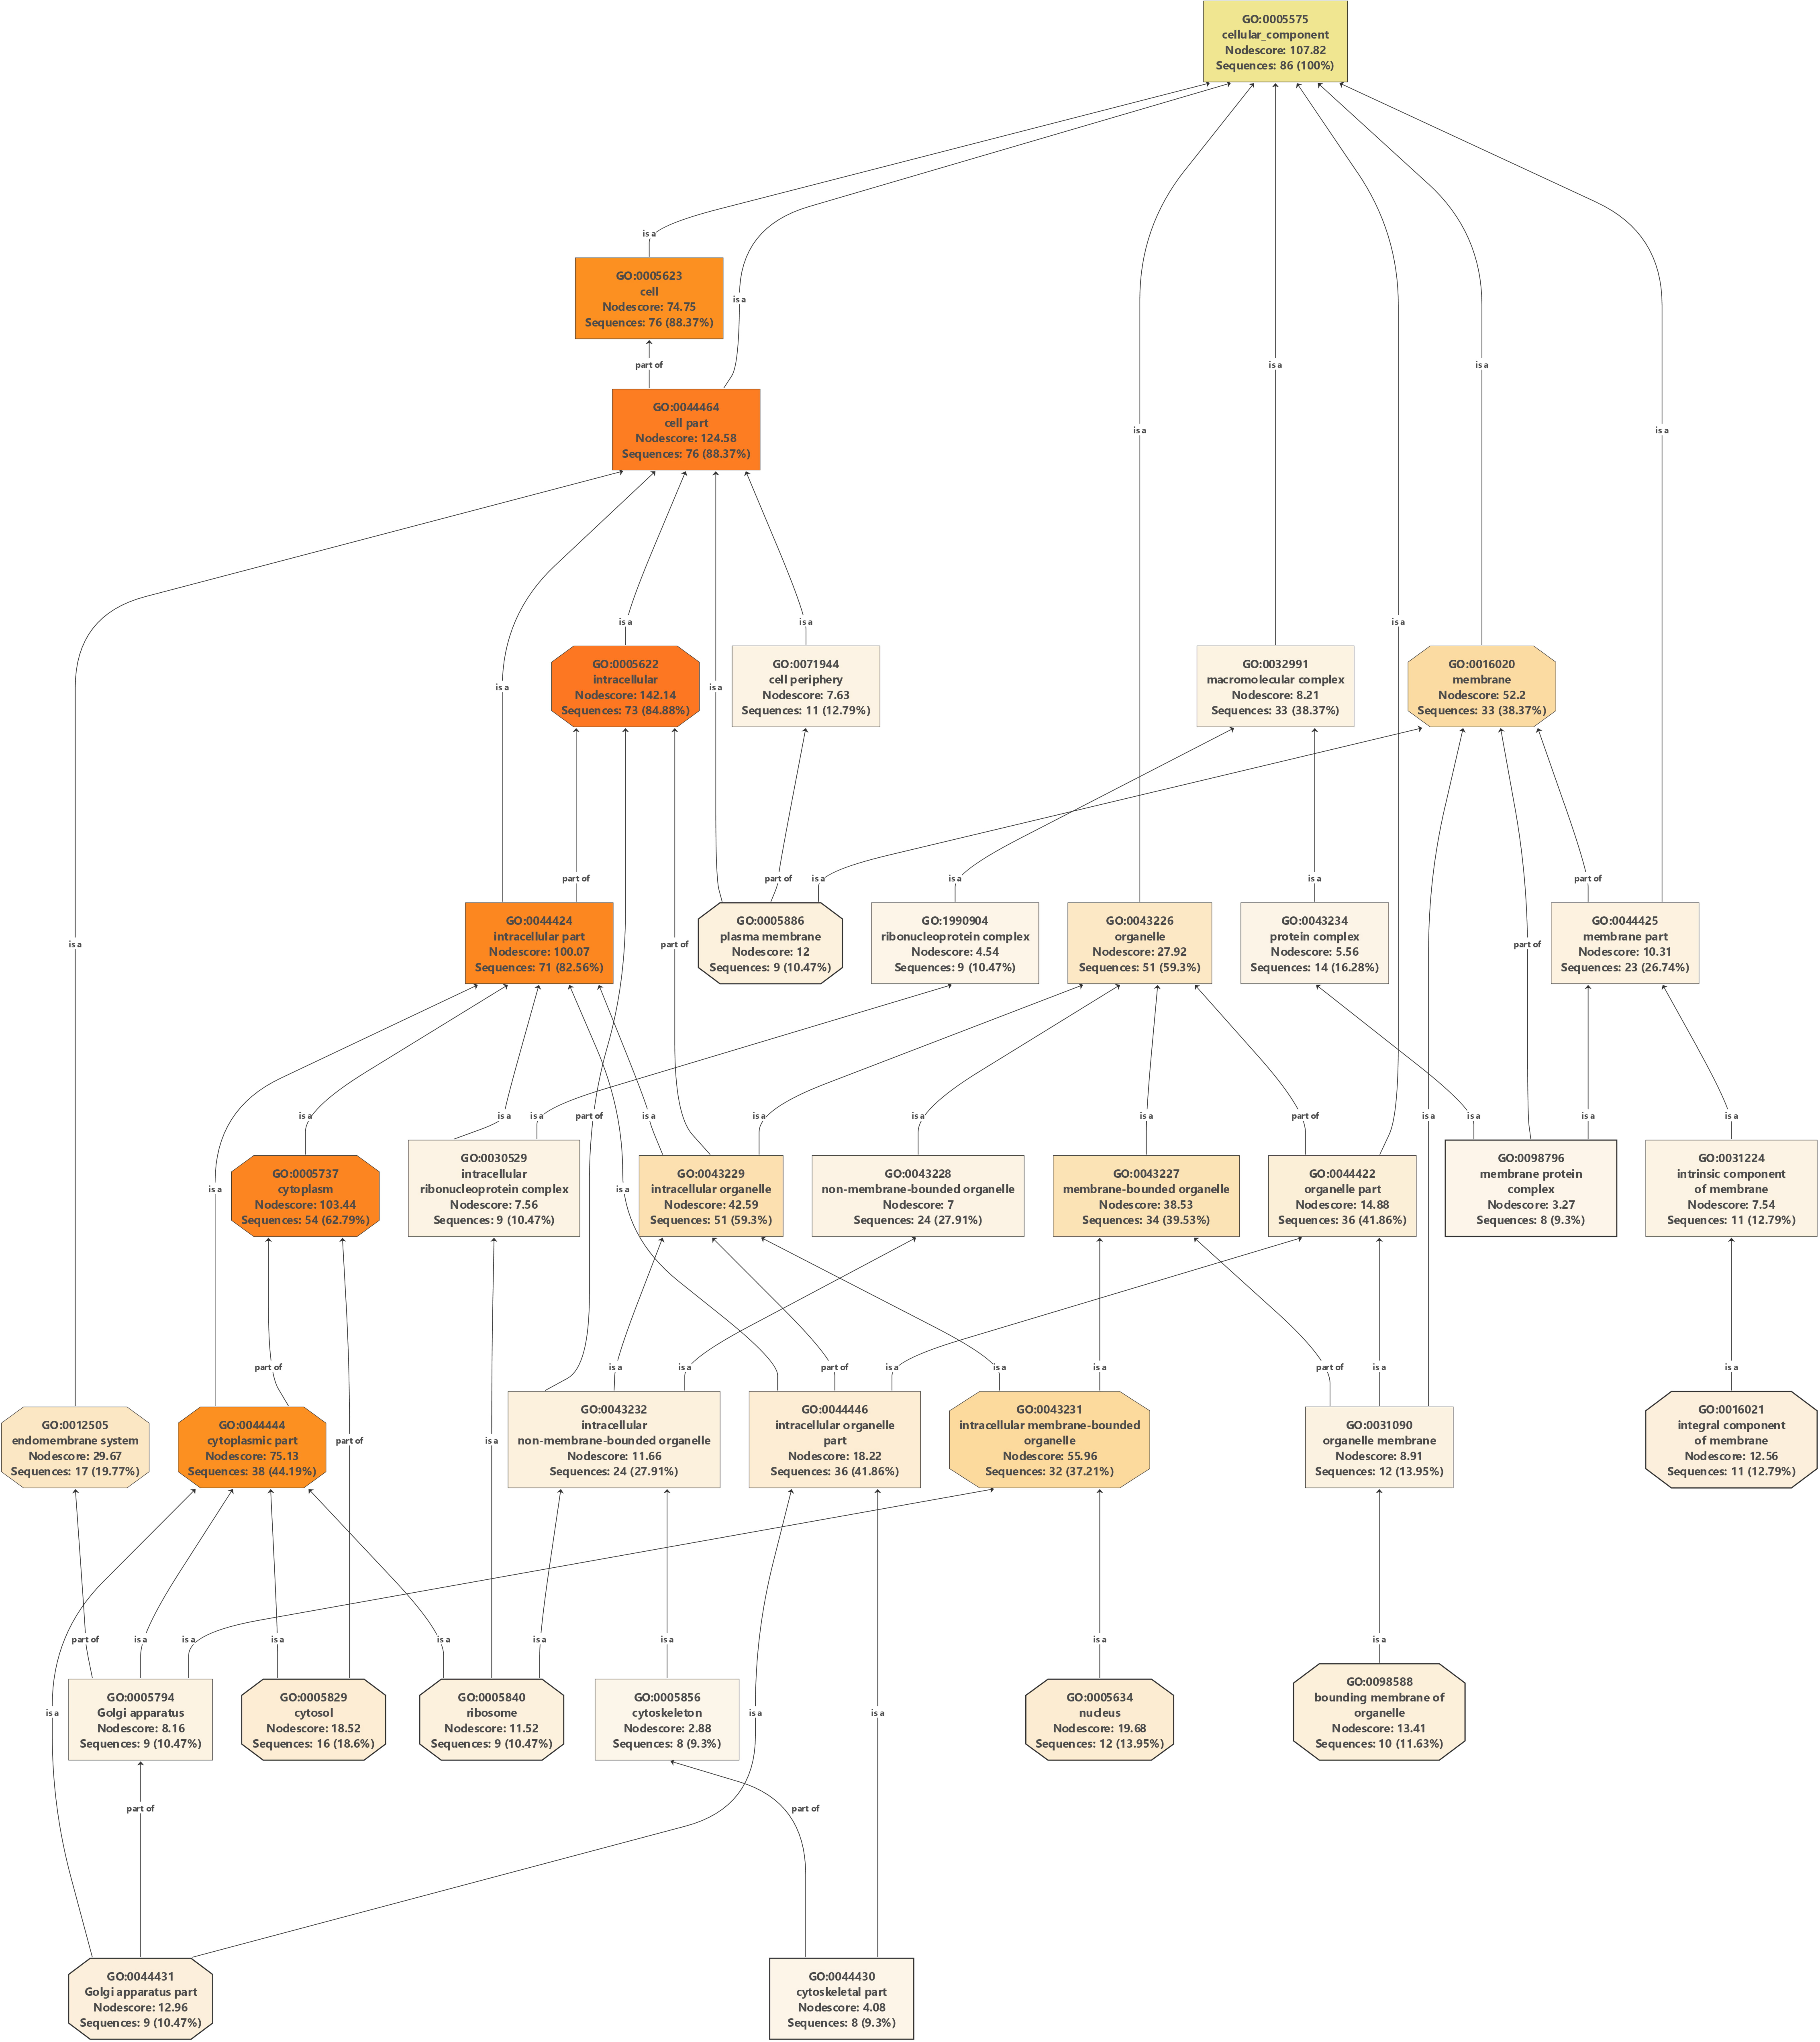

Supplement: s1 [file s1]
